# Supplementary material for: The Effect of Necrosis Inhibitor on Dextran Sulfate Sodium Induced Chronic Colitis Model in Mice
Source: MDPI journal article supplement (doi:10.3390/pharmaceutics15010222), 2023-01-09
Supplement: s1 [file s1]

# Supplementary Materials: The Effect of Necrosis Inhibitor on Dextran Sulfate Sodium Induced Chronic Colitis Model in Mice

Dongwoo Kim, Ja Seol Koo, Soon Ha Kim, Yeong Seo Park, Jung Wan Choe, Seung Young Kim, Jong Jin Hyun, Sung Woo Jung, Young Kul Jung and Hyung Joon Yim

**Supplement Table S1.** Primer sequences for real-time PCR.

| Target gene   |         | Sequences 5' → 3'     |
|---------------|---------|-----------------------|
| Beta-actin    | Forward | AGTGTGACGTTAACATCCGTA |
|               | Reverse | GCCAGAGTAATCTCCTTCT   |
| TNF- $\alpha$ | Forward | ACGTCGTAGCAAACCACCAA  |
|               | Reverse | TCCCTCAGGGGTGTCCTTAG  |
| HMGB1         | Forward | GGCTGACAAGGCTCGTTATG  |
|               | Reverse | CAGGATGCTCGCCTTTGATT  |
| IL-6          | Forward | CGGAGGCTTAATTACACATG  |

**Supplement Table S2.** Antibodies for Western blot assay.

| Antibody         | Source information                                   | Dosage |
|------------------|------------------------------------------------------|--------|
| GAPDH            | Cell Cell signaling Technology<br>(Rabbit mAb #5174) | 1:5000 |
| iNOS             | BD Transduction<br>(Mouse mAb 610431)                | 1:5000 |
| NF- $\kappa$ B   | Cell signaling Technology<br>(Rabbit mAb #8242)      | 1:5000 |
| p-NF- $\kappa$ B | Cell signaling Technology<br>(Mouse mAb #13346S)     | 1:5000 |
